# Supplementary material for: In Vivo Metabolism of [1,6-13C2]Glucose Reveals Distinct Neuroenergetic Functionality between Mouse Hippocampus and Hypothalamus
Source: Metabolites. 2021 Jan 12;11(1):50. doi: 10.3390/metabo11010050 (PMC7828183; doi:10.3390/metabo11010050)
Supplement: Supplementary file 1 [file metabolites-11-00050-s001.zip]

Archive with 4 entries (4 files):
- __MACOSX/._Cherix_et_al-Supplementary_material.pdf
- __MACOSX/._Cherix_et_al-Supplemetary_data.xlsx
- Cherix_et_al-Supplementary_material.pdf
- Cherix_et_al-Supplemetary_data.xlsx
