# Supplementary material for: In Vivo Metabolism of [1,6-13C2]Glucose Reveals Distinct Neuroenergetic Functionality between Mouse Hippocampus and Hypothalamus
Source: Metabolites. 2021 Jan 12;11(1):50. doi: 10.3390/metabo11010050 (PMC7828183; doi:10.3390/metabo11010050)
Supplement: Supplementary file 1 [file metabolites-11-00050-s001.zip › Cherix_et_al-Supplemetary_data.xlsx]

## Sheet: Hippocampus
	FE	13C con.
infusion time	GlcC6_FE	GluC4	GlnC4	LacC3	GABAC2	GABAC3	GluC2+GlnC2	GluC3+GlnC3
2.75	0.193059	0.0676734	0.0108821	0.174082	0.0108773	0.0647189	0.456864	0.132195
8.25	0.547156	0.402267	0.0397256	0.696689	0.0580839	0.0140563	0.366385	0.173174
13.75	0.523088	0.725184	0.180214	0.869766	0.166123	0.00629586	0.40205	0.238821
19.25	0.556897	1.07186	0.238897	0.988618	0.133637	0.0420847	0.686963	0.555534
24.75	0.53738	1.32347	0.300642	1.02281	0.143319	0.0712279	0.858489	0.556703
30.25	0.567571	1.51039	0.393886	1.03464	0.197806	0.0607414	1.15705	0.912019
35.75	0.571219	1.75485	0.464382	1.07837	0.244609	0.105067	1.32453	1.02017
41.25	0.589317	1.9413	0.528268	1.10434	0.280031	0.135605	1.53807	1.37478
46.75	0.571799	2.05469	0.59892	1.09883	0.299397	0.128822	1.67308	1.48979
52.25	0.528562	2.16026	0.63866	1.0639	0.316965	0.171369	1.69523	1.65428
57.75	0.602207	2.23538	0.707445	1.12168	0.376894	0.170508	1.89229	1.87494
63.25	0.600606	2.35395	0.76544	1.13864	0.434597	0.162507	2.22592	1.93485
68.75	0.609183	2.40609	0.865061	1.13808	0.431021	0.159322	2.45285	2.09585
74.25	0.572544	2.54028	0.837951	1.1963	0.506386	0.260155	2.47587	2.24503
79.75	0.580372	2.62283	0.921966	1.15792	0.460982	0.267894	2.62066	2.5087
85.25	0.563227	2.67573	0.977148	1.20799	0.377115	0.270112	2.43332	2.6406
90.75	0.616988	2.70402	0.946071	1.19164	0.473462	0.276554	2.93445	2.59351
96.25	0.624402	2.71027	1.0578	1.21826	0.490639	0.366085	2.97227	2.76288
101.75	0.62082	2.84818	1.07856	1.24869	0.491489	0.354197	3.11701	3.02067
107.25	0.609353	2.91044	1.10782	1.2987	0.538625	0.37502	3.26476	3.02213
112.75	0.589213	2.94338	1.17804	1.27002	0.558204	0.368781	3.05093	3.12781
118.25	0.599053	3.01107	1.13666	1.32223	0.507637	0.365611	3.45987	3.17607
123.75	0.632519	3.07628	1.22214	1.40711	0.494805	0.427818	3.48869	3.24166
129.25	0.616398	3.15951	1.27896	1.36264	0.53162	0.422231	3.55317	3.42957
134.75	0.607339	3.13244	1.20457	1.34045	0.559828	0.450707	3.43589	3.46095
140.25	0.571887	3.11651	1.18675	1.3043	0.564417	0.41169	3.47929	3.63634
145.75	0.61364	3.22578	1.28809	1.28122	0.574996	0.517433	3.81094	3.65435
151.25	0.645792	3.27634	1.28226	1.31705	0.605741	0.537247	3.6796	3.73217
156.75	0.60758	3.25433	1.33843	1.31671	0.578771	0.484379	3.85999	3.85798
162.25	0.617053	3.30024	1.29609	1.25177	0.619692	0.478142	3.83741	3.86774
167.75	0.669817	3.24564	1.33743	1.30469	0.653778	0.496468	3.9086	3.81386
173.25	0.65347	3.24811	1.36995	1.25867	0.60035	0.455491	4.13784	3.98377
178.75	0.64537	3.14275	1.30543	1.25035	0.674498	0.473497	4.11553	3.85557
184.25	0.676478	3.02871	1.31043	1.13334	0.674767	0.609351	3.96561	3.74452
189.75	0.765025	3.37188	1.38698	1.32192	0.542106	0.466123	4.16162	4.03605
195.25	0.693195	3.15795	1.40664	1.13422	0.631076	0.59742	4.17878	3.90804
200.75	0.655952	3.24334	1.40845	1.19802	0.684477	0.508812	4.05011	4.0406
206.25	0.625061	3.25462	1.27975	1.24915	0.695891	0.570421	4.04077	3.96512
211.75	0.693366	3.25884	1.41067	1.28356	0.663333	0.564634	4.26065	4.0247
217.25	0.643745	3.15874	1.43694	1.30688	0.673311	0.51458	4.05236	3.90886
222.75	0.609827	3.25165	1.43487	1.34326	0.654471	0.567005	3.93853	4.03196
228.25	0.710306	3.21209	1.37723	1.34662	0.759885	0.580977	4.29135	4.12901
233.75	0.672365	3.03657	1.45085	1.21245	0.717085	0.711174	4.32452	3.81403

## Sheet: Hypothalamus
	FE	13C con.
infusion time	GlcC6_FE	GluC4	GlnC4	LacC3	GABAC2	GABAC3	GluC2+GlnC2	GluC3+GlnC3
5.5	0.460967	0.320499	0.0400852	0.666237	0.0773322	0.089503	0.722906	0.215657
16.6	0.574146	1.05124	0.231173	1.46193	0.124748	0.0739562	1.33327	0.282921
27.7	0.531694	1.62686	0.387671	1.51758	0.328664	0.118147	1.80024	0.933772
38.8	0.550403	1.80724	0.565238	1.50648	0.477267	0.150665	2.23176	1.18805
49.9	0.494431	1.99701	0.687764	1.40465	0.644827	0.378829	2.24752	1.72202
61	0.46769	2.2668	0.790173	1.40746	0.650071	0.441873	2.3527	2.105
72.1	0.511658	2.38708	0.852465	1.30896	0.689305	0.409133	2.53338	2.23435
83.2	0.479374	2.53418	1.01996	1.42734	0.778759	0.604628	2.52311	2.52835
94.3	0.490864	2.5543	0.983136	1.31597	0.885218	0.583325	2.74804	2.65601
105.4	0.483825	2.65344	1.18241	1.39393	0.874604	0.627165	2.9736	2.7706
116.5	0.491245	2.76732	1.03147	1.40206	0.881072	0.676542	2.96244	2.97155
127.6	0.498677	2.78168	1.14837	1.36795	1.02389	0.69267	3.24913	3.18654
138.7	0.539284	2.83035	1.42891	1.38581	0.993955	0.742334	3.3395	3.19735
149.8	0.467535	2.88056	1.24011	1.34323	0.943885	0.77495	3.16871	3.36397
160.9	0.470243	2.89829	1.27871	1.31829	0.965703	0.780986	2.96136	3.64153
172	0.471256	2.92614	1.23055	1.40486	1.09593	0.845503	3.29578	3.62906
183.1	0.461429	2.84976	1.29009	1.47075	1.05134	0.818859	3.07355	3.79054
194.2	0.441479	2.79446	1.27574	1.40273	0.94242	0.873342	3.04646	3.42445
205.3	0.501736	2.8575	1.26247	1.26785	1.04386	0.775403	3.25694	3.6933
216.4	0.507212	2.81951	1.33814	1.12121	1.02105	0.733845	3.11082	3.75117
227.5	0.453113	2.79835	1.36567	1.22395	0.9696	0.808926	3.32688	3.93476
238.6	0.490142	2.87282	1.18112	1.31637	1.01011	0.858427	3.30466	3.62738
